# Supplementary material for: Psychometric properties of an instrument to assess teachers’ practice of differentiated instruction (IATPDI): a confirmatory factor analysis on Bhutanese teachers’ data
Source: Frontiers journal article supplement (doi:10.3389/feduc.2024.1445865), 2024-11-13
Supplement: Data_Sheet_1.zip [file Data_Sheet_1.zip]

## Sheet: Sheet1
Gender_Full	Gender	School Level	School_Level	3. Teaching Experience:	Teaching_Experience	4. Current teaching class:	Teaching_Class	5. Current teaching subject:	Teaching Period in a week	Teaching_Period	Teacher Qualification	Teacher_Qualification	I1	Mean	I2	Mean	I3	Mean	I4	Mean	I5	Mean	I6	Mean	I7	Mean	I8	Mean	Assessment Mean	Mean	Log_Mean1	I9	Mean	I10	Mean	I11	Mean	I12	Mean	I13	Mean	I14	Mean	I15	Mean	I16	Mean	I17	Mean
Male	M	Primary School	PS	Below 5 years	A	Class PP- VI	A	Science	Below 14 periods	A	B.Ed in Primary Education	A	1	3.27426	1	2.92827	1	2.90295	1	2.47679	1	2.73418	1	2.36709	1	2.97468	4	3.32068	2.04388	2.86726	0.310456	2	2.82278	2	3.42616	2	3.39662	2	3.13502	2	3.40928	2	3.40506	2	3.08861	2	3.21519	2	3.09705
Male	M	Primary School	PS	16 years and above	D	Class PP- VI	A	Dzongkha	Below 14 periods	A	B.Ed in Primary Education	A	3		3		2		3		2		1		3		4		2.625		0.419129	3		3		3		3		3		4		3		3		3
Female	F	Middle School	MS	11-15 years	C	Class IX - XII	C	Mathematics	21 - 25 periods	C	Postgraduate Diploma in Education	C	2		1		3		2		2		1		2		4		2.125		0.327359	2		2		3		3		2		2		2		2		2
Female	F	Primary School	PS	16 years and above	D	Class PP- VI	A	English	Above 25 periods	D	B.Ed in Primary Education	A	3		2		3		3		3		1		3		4		2.75		0.439333	2		4		3		3		4		4		3		3		3
Male	M	Middle School	MS	Below 5 years	A	Class VII –VIII	B	Mathematics	21 - 25 periods	C	B.Ed in Secondary Education	B	3		3		3		3		3		1		4		4		3		0.477121	3		3		3		4		3		4		3		3		4
Female	F	Middle School	MS	11-15 years	C	Class VII –VIII	B	Information technology	21 - 25 periods	C	Master's degree	D	2		2		1		1		2		1		2		4		1.875		0.273001	2		4		4		2		3		3		2		2		4
Male	M	High School	HS	Below 5 years	A	Class IX - XII	C	Science	21 - 25 periods	C	Postgraduate Diploma in Education	C	3		2		3		2		3		1		3		4		2.625		0.419129	2		3		3		3		3		3		2		3		3
Male	M	High School	HS	Below 5 years	A	Class IX - XII	C	Mathematics	21 - 25 periods	C	Postgraduate Diploma in Education	C	4		3		3		2		3		1		3		4		2.875		0.458638	4		3		3		4		3		4		3		4		3
Female	F	High School	HS	16 years and above	D	Class IX - XII	C	Dzongkha	21 - 25 periods	C	Master's degree	D	4		3		2		3		3		1		3		4		2.875		0.458638	3		4		4		3		4		4		2		4		3
Male	M	High School	HS	6-10 years	B	Class IX - XII	C	Science	15 - 20 periods	B	Master's degree	D	4		2		3		2		2		1		2		4		2.5		0.39794	1		3		4		2		2		4		3		2		2
Male	M	Middle School	MS	6-10 years	B	Class IX - XII	C	Science	15 - 20 periods	B	Master's degree	D	3		2		3		3		3		1		3		4		2.75		0.439333	3		3		3		2		3		4		3		3		3
Male	M	High School	HS	6-10 years	B	Class IX - XII	C	Science	15 - 20 periods	B	B.Ed in Secondary Education	B	4		3		3		4		3		1		4		4		3.25		0.511883	3		4		4		3		4		4		4		4		3
Male	M	Middle School	MS	6-10 years	B	Class IX - XII	C	Mathematics	21 - 25 periods	C	B.Ed in Secondary Education	B	3		3		4		4		4		4		4		4		3.75		0.574031	4		2		2		3		3		3		4		3		3
Female	F	High School	HS	16 years and above	D	Class IX - XII	C	Science	21 - 25 periods	C	Master's degree	D	2		2		2		1		2		2		2		4		2.125		0.327359	3		4		3		2		3		2		3		2		2
Female	F	Middle School	MS	6-10 years	B	Class VII –VIII	B	English	21 - 25 periods	C	Master's degree	D	3		3		2		2		2		1		2		4		2.375		0.375664	2		4		2		3		4		4		3		3		4
Male	M	Primary School	PS	16 years and above	D	Class PP- VI	A	English	15 - 20 periods	B	Master's degree	D	2		2		3		1		2		2		2		4		2.25		0.352183	3		2		3		2		3		3		2		3		3
Male	M	High School	HS	11-15 years	C	Class IX - XII	C	Science	15 - 20 periods	B	Master's degree	D	4		4		3		2		1		1		3		4		2.75		0.439333	3		4		4		3		3		3		2		1		4
Male	M	Primary School	PS	11-15 years	C	Class PP- VI	A	Mathematics	21 - 25 periods	C	B.Ed in Primary Education	A	3		3		3		2		2		2		2		4		2.625		0.419129	3		3		3		3		3		3		3		3		3
Male	M	High School	HS	6-10 years	B	Class VII –VIII	B	English	15 - 20 periods	B	B.Ed in Primary Education	A	4		3		2		1		1		1		2		4		2.25		0.352183	2		3		4		2		4		4		4		4		2
Male	M	Primary School	PS	11-15 years	C	Class VII –VIII	B	Mathematics	15 - 20 periods	B	B.Ed in Primary Education	A	2		2		1		1		1		1		1		4		1.625		0.210853	2		3		2		2		3		3		3		3		3
Female	F	High School	HS	11-15 years	C	Class IX - XII	C	English	21 - 25 periods	C	Master's degree	D	3		2		2		1		2		1		1		4		2		0.30103	2		4		3		3		3		3		3		4		2
Male	M	High School	HS	Below 5 years	A	Class IX - XII	C	English	21 - 25 periods	C	Postgraduate Diploma in Education	C	3		3		3		3		3		2		3		4		3		0.477121	3		4		4		3		3		3		3		3		4
Male	M	Primary School	PS	Below 5 years	A	Class PP- VI	A	English	21 - 25 periods	C	B.Ed in Primary Education	A	2		2		2		3		2		3		2		4		2.5		0.39794	2		3		3		3		3		3		3		3		3
Male	M	Primary School	PS	11-15 years	C	Class PP- VI	A	Mathematics	21 - 25 periods	C	B.Ed in Primary Education	A	4	0.0478253	3	0.0483813	3		4		3		3		4		3		2.70962		0.432908	3		3		4		4		3		4		3		3		3
Male	M	Middle School	MS	6-10 years	B	Class IX - XII	C	Science	15 - 20 periods	B	Master's degree	D	3		3		4		4		3		3		4		3		3.375		0.528274	3		4		4		3		4		3		3		4		3
Male	M	Middle School	MS	16 years and above	D	Class IX - XII	C	History	15 - 20 periods	B	Master's degree	D	4		3		3		3		3		2		3		3		3		0.477121	3		2		3		3		2		3		2		3		3
Male	M	Middle School	MS	11-15 years	C	Class IX - XII	C	English	15 - 20 periods	B	Master's degree	D	3		3		3		3		3		4		4		3		3.25		0.511883	3		3		3		3		3		3		4		3		3
Male	M	High School	HS	16 years and above	D	Class IX - XII	C	Science	Below 14 periods	A	Master's degree	D	2		2		2		2		2		2		2		3		2.125		0.327359	3		3		3		3		3		3		3		3		3
Male	M	High School	HS	6-10 years	B	Class IX - XII	C	Science	15 - 20 periods	B	B.Ed in Secondary Education	B	2		2		3		1		2		1		3		3		2.125		0.327359	3		3		3		3		2		2		3		3		2
Male	M	High School	HS	16 years and above	D	Class IX - XII	C	Science	15 - 20 periods	B	B.Ed in Secondary Education	B	1		2		1		1		1		1		2		3		1.5		0.176091	2		2		2		2		2		2		2		2		1
Male	M	High School	HS	6-10 years	B	Class IX - XII	C	English	15 - 20 periods	B	Postgraduate Diploma in Education	C	4		4		4		4		4		4		4		3		3.875		0.588272	4		4		4		4		4		4		4		4		4
Male	M	High School	HS	11-15 years	C	Class IX - XII	C	Science	15 - 20 periods	B	Master's degree	D	2		2		3		3		3		3		3		3		2.75		0.439333	3		3		3		3		3		3		3		3		3
Male	M	High School	HS	Below 5 years	A	Class IX - XII	C	Information technology	21 - 25 periods	C	B.Ed in Secondary Education	B	2		2		2		2		2		3		2		3		2.25		0.352183	2		2		2		2		2		2		2		2		2
Male	M	High School	HS	6-10 years	B	Class IX - XII	C	Mathematics	21 - 25 periods	C	B.Ed in Secondary Education	B	3		3		3		2		3		3		2		3		2.75		0.439333	3		3		3		3		3		2		2		3		3
Male	M	High School	HS	Below 5 years	A	Class IX - XII	C	Science	21 - 25 periods	C	Postgraduate Diploma in Education	C	3		4		3		3		3		3		3		3		3.125		0.49485	3		4		4		4		3		4		3		4		2
Female	F	Primary School	PS	11-15 years	C	Class PP- VI	A	Information technology	21 - 25 periods	C	Master's degree	D	4		3		3		3		3		3		3		3		3.125		0.49485	3		4		3		3		3		4		3		3		3
Female	F	Middle School	MS	6-10 years	B	Class IX - XII	C	Science	Above 25 periods	D	B.Ed in Secondary Education	B	4		4		3		2		3		3		4		3		3.25		0.511883	3		4		4		4		4		4		4		4		3
Female	F	High School	HS	11-15 years	C	Class IX - XII	C	Science	21 - 25 periods	C	Master's degree	D	4		4		4		4		3		3		4		3		3.625		0.559308	3		4		4		4		4		4		4		4		4
Female	F	High School	HS	Below 5 years	A	Class IX - XII	C	Information technology	Above 25 periods	D	B.Ed in Secondary Education	B	3		3		3		3		3		3		3		3		3		0.477121	3		3		3		3		3		3		3		3		3
Male	M	High School	HS	6-10 years	B	Class IX - XII	C	Science	15 - 20 periods	B	Master's degree	D	3		3		3		3		4		3		3		3		3.125		0.49485	4		4		4		4		4		4		4		4		4
Male	M	High School	HS	Below 5 years	A	Class IX - XII	C	Dzongkha	15 - 20 periods	B	Master's degree	D	3		2		2		3		3		2		2		3		2.5		0.39794	3		4		3		3		4		3		3		2		3
Male	M	High School	HS	6-10 years	B	Class IX - XII	C	Geography	21 - 25 periods	C	B.Ed in Secondary Education	B	3		3		3		2		4		3		3		3		3		0.477121	3		4		4		3		4		4		3		3		3
Male	M	Middle School	MS	16 years and above	D	Class PP- VI	A	English	21 - 25 periods	C	B.Ed in Primary Education	A	4		3		4		2		4		3		4		3		3.375		0.528274	3		4		3		4		4		4		3		2		4
Female	F	Middle School	MS	11-15 years	C	Class IX - XII	C	English	21 - 25 periods	C	Postgraduate Diploma in Education	C	3		3		4		2		3		3		3		3		3		0.477121	3		4		3		3		3		3		3		3		3
Female	F	High School	HS	11-15 years	C	Class IX - XII	C	English	21 - 25 periods	C	Master's degree	D	2		2		3		2		1		2		3		3		2.25		0.352183	2		3		3		4		4		4		3		3		2
Male	M	High School	HS	Below 5 years	A	Class IX - XII	C	Dzongkha	15 - 20 periods	B	Postgraduate Diploma in Education	C	3		2		3		2		2		2		3		3		2.5		0.39794	3		4		3		3		3		3		3		3		3
Male	M	Primary School	PS	11-15 years	C	Class PP- VI	A	English	15 - 20 periods	B	B.Ed in Primary Education	A	4		3		3		3		3		2		4		3		3.125		0.49485	3		3		3		3		3		4		4		4		4
Male	M	High School	HS	Below 5 years	A	Class IX - XII	C	Science	15 - 20 periods	B	Postgraduate Diploma in Education	C	3		3		3		2		3		2		3		3		2.75		0.439333	3		3		3		4		3		3		3		3		3
Male	M	Primary School	PS	6-10 years	B	Class PP- VI	A	English	21 - 25 periods	C	B.Ed in Primary Education	A	4		3		3		2		3		2		4		3		3		0.477121	3		4		4		3		3		4		3		4		4
Female	F	High School	HS	6-10 years	B	Class IX - XII	C	Mathematics	21 - 25 periods	C	Master's degree	D	4		3		2		2		2		2		3		4		2.75		0.439333	2		4		3		4		3		3		3		3		3
Male	M	High School	HS	11-15 years	C	Class IX - XII	C	English	15 - 20 periods	B	Postgraduate Diploma in Education	C	4		3		3		2		4		2		2		3		2.875		0.458638	3		3		4		3		4		4		4		4		3
Female	F	High School	HS	6-10 years	B	Class IX - XII	C	History	21 - 25 periods	C	Postgraduate Diploma in Education	C	4		3		3		2		2		2		2		4		2.75		0.439333	3		3		3		3		3		3		3		3		3
Male	M	Middle School	MS	6-10 years	B	Class VII –VIII	B	Mathematics	21 - 25 periods	C	B.Ed in Secondary Education	B	3		2		2		1		2		2		2		3		2.125		0.327359	3		2		3		2		2		3		2		2		3
Male	M	Middle School	MS	6-10 years	B	Class IX - XII	C	Information technology	21 - 25 periods	C	Postgraduate Diploma in Education	C	2		3		2		2		2		2		2		3		2.25		0.352183	2		3		2		3		3		3		2		2		2
Female	F	High School	HS	6-10 years	B	Class IX - XII	C	Science	21 - 25 periods	C	Master's degree	D	4		3		3		3		3		2		4		3		3.125		0.49485	3		3		4		4		4		4		4		4		4
Male	M	High School	HS	11-15 years	C	Class IX - XII	C	Geography	15 - 20 periods	B	Master's degree	D	3		3		2		3		3		2		4		3		2.875		0.458638	3		4		4		4		4		4		4		4		3
Female	F	High School	HS	6-10 years	B	Class IX - XII	C	Dzongkha	21 - 25 periods	C	Master's degree	D	2		3		3		2		2		2		3		3		2.5		0.39794	3		3		3		3		3		3		3		3		3
Male	M	Primary School	PS	16 years and above	D	Class PP- VI	A	Mathematics	21 - 25 periods	C	B.Ed in Primary Education	A	3		3		3		2		1		1		2		3		2.25		0.352183	3		4		4		4		3		3		2		4		4
Male	M	High School	HS	16 years and above	D	Class IX - XII	C	Science	Below 14 periods	A	Master's degree	D	3		3		3		3		3		3		3		3		3		0.477121	3		3		3		3		3		3		3		3		3
Male	M	High School	HS	6-10 years	B	Class IX - XII	C	Science	15 - 20 periods	B	Postgraduate Diploma in Education	C	3		4		3		3		3		2		3		3		3		0.477121	3		4		3		4		4		4		3		3		3
Male	M	Middle School	MS	Below 5 years	A	Class IX - XII	C	Dzongkha	15 - 20 periods	B	Postgraduate Diploma in Education	C	4		4		3		3		4		3		3		3		3.375		0.528274	3		3		3		4		3		3		3		3		2
Female	F	High School	HS	6-10 years	B	Class IX - XII	C	Economics	21 - 25 periods	C	Postgraduate Diploma in Education	C	4		4		4		4		4		4		2		3		3.625		0.559308	4		4		4		4		4		4		4		2		4
Male	M	High School	HS	Below 5 years	A	Class IX - XII	C	Science	15 - 20 periods	B	Postgraduate Diploma in Education	C	3		3		3		3		4		3		3		3		3.125		0.49485	3		3		3		3		3		3		2		3		3
Female	F	High School	HS	6-10 years	B	Class IX - XII	C	Accountancy	21 - 25 periods	C	Postgraduate Diploma in Education	C	4		4		3		3		4		3		3		3		3.375		0.528274	3		3		3		3		3		3		3		3		3
Male	M	High School	HS	6-10 years	B	Class IX - XII	C	Science	15 - 20 periods	B	Postgraduate Diploma in Education	C	4		3		4		4		4		3		3		4		3.625		0.559308	3		3		3		4		3		3		4		3		2
Male	M	Middle School	MS	6-10 years	B	Class VII –VIII	B	Mathematics	15 - 20 periods	B	Master's degree	D	3		2		3		2		3		2		3		4		2.75		0.439333	3		4		3		4		3		3		3		3		3
Female	F	Middle School	MS	16 years and above	D	Class IX - XII	C	Geography	21 - 25 periods	C	Master's degree	D	3		3		2		2		2		3		3		4		2.75		0.439333	2		2		2		3		3		3		3		2		2
Male	M	High School	HS	11-15 years	C	Class IX - XII	C	Dzongkha	15 - 20 periods	B	Master's degree	D	3		2		3		2		2		1		2		4		2.375		0.375664	2		3		3		3		3		4		3		2		2
Female	F	High School	HS	11-15 years	C	Class IX - XII	C	Science	21 - 25 periods	C	Master's degree	D	4		3		4		3		2		3		4		4		3.375		0.528274	3		4		3		3		3		3		4		4		3
Male	M	High School	HS	16 years and above	D	Class PP- VI	A	Science	21 - 25 periods	C	B.Ed in Primary Education	A	4		3		3		3		3		2		4		4		3.25		0.511883	3		2		3		3		3		3		3		3		3
Female	F	Middle School	MS	16 years and above	D	Class IX - XII	C	History	21 - 25 periods	C	Master's degree	D	4		4		3		3		3		3		3		4		3.375		0.528274	4		4		4		3		4		4		3		4		4
Female	F	High School	HS	6-10 years	B	Class IX - XII	C	Mathematics	21 - 25 periods	C	Postgraduate Diploma in Education	C	3		2		3		3		3		3		3		4		3		0.477121	3		3		3		2		4		4		3		2		3
Male	M	High School	HS	11-15 years	C	Class PP- VI	A	Science	15 - 20 periods	B	Master's degree	D	3		2		2		3		2		3		3		4		2.75		0.439333	3		2		3		3		3		4		2		2		3
Male	M	High School	HS	16 years and above	D	Class IX - XII	C	Science	21 - 25 periods	C	B.Ed in Secondary Education	B	4		4		3		3		2		3		3		4		3.25		0.511883	3		4		3		3		3		3		2		2		2
Male	M	Middle School	MS	Below 5 years	A	Class IX - XII	C	Science	15 - 20 periods	B	B.Ed in Secondary Education	B	4		4		3		3		3		3		2		4		3.25		0.511883	2		3		3		3		3		3		3		3		3
Male	M	High School	HS	Below 5 years	A	Class IX - XII	C	Science	15 - 20 periods	B	B.Ed in Secondary Education	B	3		2		3		2		2		3		3		4		2.75		0.439333	2		3		3		2		3		3		2		3		4
Male	M	Middle School	MS	6-10 years	B	Class IX - XII	C	Science	15 - 20 periods	B	Master's degree	D	3		3		2		2		2		3		3		4		2.75		0.439333	2		3		3		3		3		3		3		3		3
Male	M	Middle School	MS	11-15 years	C	Class IX - XII	C	Science	21 - 25 periods	C	B.Ed in Secondary Education	B	3		4		3		2		3		3		4		4		3.25		0.511883	3		4		4		4		4		4		3		4		4
Female	F	High School	HS	6-10 years	B	Class IX - XII	C	Science	Above 25 periods	D	Postgraduate Diploma in Education	C	4		3		4		3		3		2		4		4		3.375		0.528274	2		4		4		3		4		4		4		3		3
Male	M	High School	HS	6-10 years	B	Class IX - XII	C	Mathematics	15 - 20 periods	B	Postgraduate Diploma in Education	C	2		2		2		1		1		1		2		3		1.75		0.243038	3		4		3		3		2		3		2		2		2
Male	M	Primary School	PS	6-10 years	B	Class PP- VI	A	English	21 - 25 periods	C	B.Ed in Primary Education	A	4		4		4		3		4		3		4		3		3.625		0.559308	4		4		4		4		4		4		1		1		4
Male	M	Middle School	MS	6-10 years	B	Class IX - XII	C	Science	15 - 20 periods	B	Postgraduate Diploma in Education	C	3		4		3		3		4		3		3		3		3.25		0.511883	3		4		3		3		4		4		4		4		3
Male	M	Primary School	PS	Below 5 years	A	Class PP- VI	A	Mathematics	15 - 20 periods	B	B.Ed in Primary Education	A	2		3		2		2		4		1		3		3		2.5		0.39794	2		4		3		2		4		4		2		3		4
Male	M	Middle School	MS	11-15 years	C	Class IX - XII	C	Science	15 - 20 periods	B	Master's degree	D	2		2		2		2		4		2		2		3		2.375		0.375664	2		2		2		2		4		2		2		2		2
Male	M	Primary School	PS	6-10 years	B	Class PP- VI	A	Dzongkha	21 - 25 periods	C	B.Ed in Secondary Education	B	2		2		2		2		4		2		2		3		2.375		0.375664	2		3		3		3		4		2		1		1		2
Female	F	High School	HS	11-15 years	C	Class IX - XII	C	English	21 - 25 periods	C	Master's degree	D	3		2		2		3		4		1		4		3		2.75		0.439333	2		3		4		3		4		3		3		4		3
Female	F	High School	HS	16 years and above	D	Class VII –VIII	B	Geography	Above 25 periods	D	Master's degree	D	3		2		2		2		4		2		2		3		2.5		0.39794	2		3		3		3		4		3		2		3		3
Male	M	High School	HS	Below 5 years	A	Class IX - XII	C	Science	21 - 25 periods	C	Postgraduate Diploma in Education	C	4		3		2		2		4		1		2		3		2.625		0.419129	1		4		3		3		4		4		3		2		4
Female	F	High School	HS	11-15 years	C	Class IX - XII	C	Science	21 - 25 periods	C	Master's degree	D	4		3		4		2		4		3		3		3		3.25		0.511883	2		4		4		3		4		4		4		3		3
Female	F	High School	HS	11-15 years	C	Class IX - XII	C	Science	21 - 25 periods	C	Master's degree	D	3		3		3		3		4		2		4		3		3.125		0.49485	3		4		3		2		4		3		3		3		2
Male	M	Middle School	MS	6-10 years	B	Class IX - XII	C	History	21 - 25 periods	C	B.Ed in Secondary Education	B	4		2		3		2		4		2		3		3		2.875		0.458638	2		2		4		2		4		4		4		4		3
Male	M	High School	HS	Below 5 years	A	Class IX - XII	C	Mathematics	21 - 25 periods	C	B.Ed in Secondary Education	B	3		2		2		2		2		2		3		3		2.375		0.375664	3		3		3		2		4		3		2		3		3
Male	M	High School	HS	16 years and above	D	Class IX - XII	C	Science	15 - 20 periods	B	Master's degree	D	3		3		2		1		1		1		4		3		2.25		0.352183	2		4		3		2		4		4		3		2		4
Male	M	High School	HS	Below 5 years	A	Class IX - XII	C	Science	15 - 20 periods	B	Postgraduate Diploma in Education	C	3		2		2		1		1		1		2		3		1.875		0.273001	2		2		2		2		4		2		2		2		2
Female	F	Primary School	PS	11-15 years	C	Class PP- VI	A	English	Above 25 periods	D	B.Ed in Primary Education	A	4		4		2		2		3		2		3		3		2.875		0.458638	2		3		3		2		3		3		2		3		3
Male	M	High School	HS	16 years and above	D	Class IX - XII	C	English	15 - 20 periods	B	Postgraduate Diploma in Education	C	3		3		3		3		3		3		3		3		3		0.477121	3		3		3		2		3		3		3		3		3
Male	M	High School	HS	Below 5 years	A	Class IX - XII	C	Science	21 - 25 periods	C	B.Ed in Secondary Education	B	3		2		2		2		1		1		2		3		2		0.30103	1		2		2		2		3		3		2		3		2
Female	F	High School	HS	11-15 years	C	Class IX - XII	C	Science	21 - 25 periods	C	Master's degree	D	2		2		2		2		2		2		2		4		2.25		0.352183	2		2		3		2		2		2		2		2		2
Male	M	Middle School	MS	Below 5 years	A	Class PP- VI	A	English	15 - 20 periods	B	B.Ed in Primary Education	A	3		3		2		2		2		1		2		4		2.375		0.375664	1		2		2		2		2		2		2		2		2
Male	M	High School	HS	6-10 years	B	Class IX - XII	C	Mathematics	15 - 20 periods	B	Master's degree	D	2		2		1		1		1		1		3		3		1.75		0.243038	2		4		4		2		4		3		2		3		2
Male	M	High School	HS	16 years and above	D	Class IX - XII	C	Mathematics	15 - 20 periods	B	Master's degree	D	2		2		2		1		2		1		1		3		1.75		0.243038	2		2		2		2		3		3		3		2		2
Male	M	Primary School	PS	Below 5 years	A	Class PP- VI	A	Mathematics	15 - 20 periods	B	B.Ed in Primary Education	A	4	SD	4	SD	4	SD	3	SD	3	SD	4	SD	3	SD	4	SD	3.625	SD	0.559308	3	SD	4	SD	4	SD	2	SD	4	SD	3	SD	4	SD	3	SD	3	SD
Male	M	Primary School	PS	Below 5 years	A	Class PP- VI	A	English	21 - 25 periods	C	B.Ed in Primary Education	A	4	0.676212	3	0.718976	4	0.763607	3	0.855719	3	0.817791	4	0.889184	3	0.706658	3	0.692099	2.16188		0.334831	3	0.706658	4	0.628033	4	0.661303	2	0.705159	4	0.61887	4	0.63068	4	0.692099	4	0.601841	4	0.663539
Male	M	Primary School	PS	16 years and above	D	Class PP- VI	A	English	21 - 25 periods	C	B.Ed in Primary Education	A	4	SEM	4	SEM	4		4		4		4		4		4		4		0.60206	3		4		4		2		4		4		4		4		4
Male	M	Middle School	MS	Below 5 years	A	Class VII –VIII	B	Science	15 - 20 periods	B	B.Ed in Secondary Education	B	2		3		3		1		2		2		3		3		2.375		0.375664	3		2		4		3		4		4		4		4		3
Male	M	Middle School	MS	16 years and above	D	Class PP- VI	A	Mathematics	21 - 25 periods	C	B.Ed in Primary Education	A	3		4		3		3		3		2		3		3		3		0.477121	3		3		4		3		3		3		3		3		4
Male	M	Middle School	MS	6-10 years	B	Class IX - XII	C	English	21 - 25 periods	C	B.Ed in Secondary Education	B	4		4		4		4		3		3		4		4		3.75		0.574031	4		4		4		4		4		4		3		4		4
Male	M	High School	HS	6-10 years	B	Class IX - XII	C	Science	15 - 20 periods	B	Postgraduate Diploma in Education	C	4		3		2		4		3		3		3		4		3.25		0.511883	4		4		4		4		4		4		4		4		4
Male	M	High School	HS	6-10 years	B	Class IX - XII	C	Dzongkha	15 - 20 periods	B	Postgraduate Diploma in Education	C	4		3		3		3		3		3		3		4		3.25		0.511883	4		4		4		3		4		3		3		4		4
Male	M	High School	HS	11-15 years	C	Class IX - XII	C	Science	15 - 20 periods	B	Postgraduate Diploma in Education	C	3		3		4		3		3		3		4		4		3.375		0.528274	3		4		4		4		4		4		3		4		3
Male	M	High School	HS	6-10 years	B	Class IX - XII	C	English	15 - 20 periods	B	Master's degree	D	3		3		3		3		3		3		3		4		3.125		0.49485	3		4		4		3		4		3		4		3		4
Male	M	High School	HS	16 years and above	D	Class IX - XII	C	Science	15 - 20 periods	B	Master's degree	D	3		3		3		4		2		2		3		4		3		0.477121	3		3		4		3		4		3		2		3		3
Male	M	High School	HS	11-15 years	C	Class IX - XII	C	Science	15 - 20 periods	B	Master's degree	D	3		3		3		3		4		2		3		4		3.125		0.49485	3		4		4		4		3		4		3		3		3
Male	M	High School	HS	16 years and above	D	Class IX - XII	C	English	21 - 25 periods	C	B.Ed in Primary Education	A	3		3		2		2		4		3		3		4		3		0.477121	3		4		4		4		4		4		3		3		4
Male	M	High School	HS	11-15 years	C	Class VII –VIII	B	Mathematics	21 - 25 periods	C	B.Ed in Secondary Education	B	4		4		4		4		3		3		4		4		3.75		0.574031	4		4		4		4		3		4		4		3		4
Male	M	High School	HS	6-10 years	B	Class IX - XII	C	Science	21 - 25 periods	C	B.Ed in Secondary Education	B	3		3		3		2		3		2		3		4		2.875		0.458638	2		3		4		4		4		4		3		3		3
Male	M	High School	HS	11-15 years	C	Class IX - XII	C	English	21 - 25 periods	C	B.Ed in Secondary Education	B	4		3		4		3		4		3		4		4		3.625		0.559308	3		4		4		4		4		3		3		3		3
Female	F	Primary School	PS	16 years and above	D	Class PP- VI	A	English	21 - 25 periods	C	Master's degree	D	4		3		3		3		4		3		4		4		3.5		0.544068	4		4		4		4		4		3		4		4		3
Female	F	Middle School	MS	11-15 years	C	Class IX - XII	C	Science	Above 25 periods	D	B.Ed in Secondary Education	B	4		4		4		3		3		3		3		3		3.375		0.528274	3		4		4		3		4		3		3		3		4
Female	F	High School	HS	6-10 years	B	Class IX - XII	C	Information technology	21 - 25 periods	C	Postgraduate Diploma in Education	C	2		3		2		2		3		2		3		4		2.625		0.419129	3		3		4		3		3		3		3		3		3
Female	F	High School	HS	11-15 years	C	Class IX - XII	C	Mathematics	21 - 25 periods	C	Master's degree	D	4		4		4		4		3		3		4		4		3.75		0.574031	3		3		4		3		3		3		3		3		3
Female	F	High School	HS	6-10 years	B	Class IX - XII	C	Media Studies	Above 25 periods	D	B.Ed in Primary Education	A	3		3		2		3		2		2		2		2		2.375		0.375664	2		3		4		2		3		3		3		3		3
Male	M	High School	HS	16 years and above	D	Class IX - XII	C	Dzongkha	15 - 20 periods	B	B.Ed in Secondary Education	B	4		3		3		2		2		4		3		2		2.875		0.458638	3		4		4		3		4		3		3		3		3
Male	M	High School	HS	6-10 years	B	Class IX - XII	C	Science	15 - 20 periods	B	Postgraduate Diploma in Education	C	4		2		3		1		4		3		3		2		2.75		0.439333	3		3		4		3		3		3		3		3		2
Female	F	Middle School	MS	11-15 years	C	Class IX - XII	C	Science	21 - 25 periods	C	Master's degree	D	3		2		2		2		2		2		3		2		2.25		0.352183	3		4		4		3		3		3		3		3		3
Female	F	Middle School	MS	11-15 years	C	Class IX - XII	C	Geography	21 - 25 periods	C	Master's degree	D	3		4		3		2		3		3		3		2		2.875		0.458638	3		3		4		3		3		3		4		4		3
Female	F	High School	HS	6-10 years	B	Class IX - XII	C	Mathematics	21 - 25 periods	C	Postgraduate Diploma in Education	C	4		3		3		2		2		3		4		2		2.875		0.458638	4		4		4		4		4		4		3		4		3
Female	F	Primary School	PS	Below 5 years	A	Class PP- VI	A	English	Above 25 periods	D	B.Ed in Primary Education	A	4		4		4		3		3		4		4		2		3.5		0.544068	4		4		4		4		4		4		4		4		4
Female	F	Primary School	PS	Below 5 years	A	Class PP- VI	A	English	Above 25 periods	D	Master's degree	D	3		3		3		2		3		2		3		2		2.625		0.419129	2		4		4		3		4		4		3		3		3
Male	M	Middle School	MS	16 years and above	D	Class PP- VI	A	English	15 - 20 periods	B	B.Ed in Primary Education	A	3		3		3		3		2		1		3		2		2.5		0.39794	2		4		4		3		3		3		3		3		3
Male	M	Primary School	PS	6-10 years	B	Class PP- VI	A	English	21 - 25 periods	C	B.Ed in Primary Education	A	3		3		4		3		3		2		3		2		2.875		0.458638	3		4		4		3		3		3		4		4		4
Male	M	Middle School	MS	6-10 years	B	Class IX - XII	C	Science	15 - 20 periods	B	Postgraduate Diploma in Education	C	4		3		3		2		3		3		3		2		2.875		0.458638	3		4		3		4		3		3		3		3		3
Male	M	High School	HS	11-15 years	C	Class PP- VI	A	Science	21 - 25 periods	C	B.Ed in Primary Education	A	2		3		1		3		2		2		3		2		2.25		0.352183	2		1		1		1		1		1		3		2		2
Male	M	High School	HS	6-10 years	B	Class IX - XII	C	Science	15 - 20 periods	B	Postgraduate Diploma in Education	C	3		3		3		2		2		3		3		2		2.625		0.419129	2		4		4		3		4		4		4		4		4
Male	M	Middle School	MS	11-15 years	C	Class IX - XII	C	Science	15 - 20 periods	B	Master's degree	D	3		3		3		2		3		3		4		2		2.875		0.458638	3		4		4		4		4		4		3		4		3
Male	M	High School	HS	6-10 years	B	Class IX - XII	C	Science	21 - 25 periods	C	B.Ed in Secondary Education	B	4		3		3		3		4		3		4		2		3.25		0.511883	3		4		4		3		4		3		3		4		4
Female	F	High School	HS	6-10 years	B	Class IX - XII	C	Mathematics	21 - 25 periods	C	Postgraduate Diploma in Education	C	4		3		3		2		4		4		3		2		3.125		0.49485	3		3		3		4		4		4		4		4		3
Female	F	Primary School	PS	6-10 years	B	Class PP- VI	A	Mathematics	Above 25 periods	D	B.Ed in Primary Education	A	4		3		3		2		2		3		3		2		2.75		0.439333	2		4		4		4		4		4		3		3		3
Female	F	High School	HS	Below 5 years	A	Class IX - XII	C	Science	Above 25 periods	D	Postgraduate Diploma in Education	C	4		3		3		3		3		3		4		2		3.125		0.49485	3		4		4		4		3		3		4		4		3
Male	M	High School	HS	6-10 years	B	Class IX - XII	C	Science	15 - 20 periods	B	B.Ed in Secondary Education	B	3		2		1		3		2		2		2		2		2.125		0.327359	3		4		4		3		3		3		2		2		2
Male	M	Middle School	MS	11-15 years	C	Class IX - XII	C	Mathematics	21 - 25 periods	C	B.Ed in Secondary Education	B	3		4		3		3		4		2		3		4		3.25		0.511883	4		4		4		4		4		3		2		4		3
Male	M	High School	HS	Below 5 years	A	Class PP- VI	A	English	21 - 25 periods	C	B.Ed in Primary Education	A	4		3		4		3		3		2		4		4		3.375		0.528274	3		4		4		4		4		4		2		4		4
Male	M	Middle School	MS	16 years and above	D	Class VII –VIII	B	Dzongkha	15 - 20 periods	B	Master's degree	D	4		3		2		3		2		2		3		4		2.875		0.458638	2		3		3		3		3		3		2		4		3
Male	M	High School	HS	6-10 years	B	Class IX - XII	C	Economics	15 - 20 periods	B	Postgraduate Diploma in Education	C	3		3		2		2		2		3		2		4		2.625		0.419129	3		4		4		3		3		3		2		3		3
Male	M	Middle School	MS	6-10 years	B	Class IX - XII	C	English	Below 14 periods	A	Master's degree	D	4		3		3		2		3		3		3		4		3.125		0.49485	4		4		4		4		3		4		2		4		3
Female	F	High School	HS	11-15 years	C	Class IX - XII	C	Science	21 - 25 periods	C	Master's degree	D	2		2		3		2		3		3		3		4		2.75		0.439333	3		4		2		2		4		4		2		3		2
Male	M	Middle School	MS	6-10 years	B	Class IX - XII	C	Science	21 - 25 periods	C	Postgraduate Diploma in Education	C	3		4		3		2		2		2		3		4		2.875		0.458638	3		4		4		4		4		4		2		4		4
Female	F	High School	HS	11-15 years	C	Class IX - XII	C	Mathematics	21 - 25 periods	C	Master's degree	D	4		4		3		2		3		2		3		4		3.125		0.49485	3		4		4		4		4		4		2		4		3
Male	M	Middle School	MS	Below 5 years	A	Class IX - XII	C	Science	15 - 20 periods	B	Postgraduate Diploma in Education	C	4		3		2		3		2		1		3		4		2.75		0.439333	3		4		4		4		4		4		2		4		3
Male	M	High School	HS	11-15 years	C	Class IX - XII	C	Geography	15 - 20 periods	B	Postgraduate Diploma in Education	C	4		3		3		2		2		2		3		4		2.875		0.458638	4		4		3		3		4		4		2		3		3
Female	F	High School	HS	11-15 years	C	Class IX - XII	C	Mathematics	21 - 25 periods	C	Master's degree	D	4		3		3		2		3		2		3		4		3		0.477121	3		3		3		3		3		3		3		3		3
Female	F	High School	HS	6-10 years	B	Class IX - XII	C	Geography	21 - 25 periods	C	Master's degree	D	3		3		4		3		3		2		3		4		3.125		0.49485	3		4		4		3		4		4		4		4		3
Female	F	High School	HS	Below 5 years	A	Class IX - XII	C	Science	Above 25 periods	D	Postgraduate Diploma in Education	C	4		3		4		3		3		3		3		4		3.375		0.528274	3		4		4		4		4		4		4		3		4
Male	M	High School	HS	11-15 years	C	Class IX - XII	C	Science	15 - 20 periods	B	Master's degree	D	3		2		3		1		2		2		3		4		2.5		0.39794	2		3		3		3		3		4		4		3		3
Female	F	High School	HS	11-15 years	C	Class IX - XII	C	History	Above 25 periods	D	Postgraduate Diploma in Education	C	3		4		3		3		3		2		3		4		3.125		0.49485	4		4		3		3		3		3		2		3		3
Male	M	High School	HS	Below 5 years	A	Class IX - XII	C	Commerce	15 - 20 periods	B	Postgraduate Diploma in Education	C	3		4		3		3		2		1		4		4		3		0.477121	2		3		4		3		3		4		2		2		2
Female	F	Middle School	MS	11-15 years	C	Class IX - XII	C	Science	Above 25 periods	D	B.Ed in Primary Education	A	3		3		3		2		3		2		3		3		2.75		0.439333	3		3		3		3		3		3		3		3		3
Male	M	High School	HS	6-10 years	B	Class IX - XII	C	Science	15 - 20 periods	B	Postgraduate Diploma in Education	C	3		3		3		2		2		2		2		3		2.5		0.39794	3		2		2		3		2		2		3		3		2
Female	F	Primary School	PS	Below 5 years	A	Class PP- VI	A	English	Above 25 periods	D	B.Ed in Primary Education	A	4		4		3		4		4		4		3		4		3.75		0.574031	3		4		4		4		4		4		4		4		4
Male	M	High School	HS	6-10 years	B	Class IX - XII	C	Science	15 - 20 periods	B	B.Ed in Secondary Education	B	4		3		3		3		3		3		4		4		3.375		0.528274	3		4		4		4		4		4		3		3		3
Male	M	High School	HS	6-10 years	B	Class IX - XII	C	English	15 - 20 periods	B	Master's degree	D	3		4		3		1		2		2		3		4		2.75		0.439333	3		4		4		2		3		3		3		3		2
Male	M	Middle School	MS	6-10 years	B	Class PP- VI	A	Dzongkha	15 - 20 periods	B	B.Ed in Secondary Education	B	2		2		1		1		1		1		2		3		1.625		0.210853	2		2		2		2		2		2		3		3		2
Female	F	High School	HS	16 years and above	D	Class IX - XII	C	Geography	21 - 25 periods	C	Master's degree	D	3		2		2		3		2		3		4		3		2.75		0.439333	4		4		4		3		4		2		3		4		3
Male	M	High School	HS	6-10 years	B	Class IX - XII	C	Geography	15 - 20 periods	B	Postgraduate Diploma in Education	C	4		3		3		2		3		2		3		3		2.875		0.458638	4		4		4		4		4		4		4		4		3
Female	F	Primary School	PS	6-10 years	B	Class PP- VI	A	Mathematics	Above 25 periods	D	B.Ed in Secondary Education	B	4		3		2		2		2		2		3		3		2.625		0.419129	3		4		4		3		3		4		4		3		2
Female	F	High School	HS	6-10 years	B	Class IX - XII	C	Science	21 - 25 periods	C	Postgraduate Diploma in Education	C	3		2		3		2		3		1		2		3		2.375		0.375664	2		3		3		3		2		3		3		3		3
Male	M	Primary School	PS	6-10 years	B	Class PP- VI	A	English	21 - 25 periods	C	B.Ed in Primary Education	A	3		3		3		2		3		2		2		3		2.625	#REF!	0.419129	2		3		2		3		3		3		3		4		3
Female	F	High School	HS	6-10 years	B	Class IX - XII	C	History	21 - 25 periods	C	Postgraduate Diploma in Education	C	3		2		3		1		2		2		3		3		2.375		0.375664	2		4		4		3		3		3		3		3		3
Male	M	High School	HS	Below 5 years	A	Class IX - XII	C	Science	21 - 25 periods	C	B.Ed in Secondary Education	B	3		2		3		2		3		3		3		3		2.75		0.439333	3		3		3		3		3		3		3		3		3
Male	M	High School	HS	Below 5 years	A	Class IX - XII	C	Economics	Below 14 periods	A	Postgraduate Diploma in Education	C	2		2		2		2		2		2		3		3		2.25		0.352183	2		2		3		3		3		3		2		3		3
Male	M	High School	HS	6-10 years	B	Class IX - XII	C	Dzongkha	15 - 20 periods	B	Postgraduate Diploma in Education	C	3		4		4		3		2		2		2		3		2.875		0.458638	3		3		3		3		3		4		4		4		4
Female	F	Middle School	MS	6-10 years	B	Class IX - XII	C	Science	21 - 25 periods	C	Master's degree	D	3		4		3		2		3		2		3		3		2.875		0.458638	4		3		3		3		3		4		4		4		4
Female	F	Primary School	PS	16 years and above	D	Class PP- VI	A	English	Above 25 periods	D	B.Ed in Primary Education	A	2		2		3		2		2		2		3		3		2.375		0.375664	2		4		3		3		2		3		3		3		2
Male	M	High School	HS	11-15 years	C	Class IX - XII	C	English	15 - 20 periods	B	B.Ed in Secondary Education	B	4		4		2		2		2		2		2		3		2.625		0.419129	2		3		4		4		4		4		4		4		4
Male	M	High School	HS	Below 5 years	A	Class IX - XII	C	Science	15 - 20 periods	B	B.Ed in Secondary Education	B	4		3		3		1		2		2		3		3		2.625		0.419129	3		3		3		3		3		2		2		3		3
Male	M	High School	HS	Below 5 years	A	Class IX - XII	C	Science	15 - 20 periods	B	Postgraduate Diploma in Education	C	2		3		3		2		2		1		2		3		2.25		0.352183	2		3		3		2		4		3		3		2		3
Male	M	High School	HS	11-15 years	C	Class IX - XII	C	Science	15 - 20 periods	B	Master's degree	D	4		4		4		2		2		2		2		3		2.875		0.458638	3		3		3		3		3		3		3		3		3
Female	F	Middle School	MS	11-15 years	C	Class VII –VIII	B	English	21 - 25 periods	C	Master's degree	D	4		4		4		4		4		1		1		3		3.125		0.49485	3		3		3		3		4		4		3		3		3
Female	F	Primary School	PS	16 years and above	D	Class PP- VI	A	Mathematics	Above 25 periods	D	B.Ed in Primary Education	A	4		3		2		1		2		1		2		3		2.25		0.352183	2		3		2		2		3		2		3		3		2
Male	M	High School	HS	6-10 years	B	Class IX - XII	C	Science	15 - 20 periods	B	Master's degree	D	3		3		3		2		1		1		4		3		2.5		0.39794	2		4		4		4		4		2		4		3		4
Male	M	Primary School	PS	Below 5 years	A	Class PP- VI	A	Science	15 - 20 periods	B	B.Ed in Primary Education	A	4		4		4		4		4		4		4		3		3.875		0.588272	3		4		4		4		4		4		3		4		4
Male	M	Middle School	MS	11-15 years	C	Class IX - XII	C	Science	15 - 20 periods	B	Master's degree	D	4		3		4		4		4		3		4		3		3.625		0.559308	4		4		4		4		4		4		4		4		3
Male	M	Middle School	MS	11-15 years	C	Class PP- VI	A	Dzongkha	21 - 25 periods	C	B.Ed in Primary Education	A	4		4		4		4		4		4		4		3		3.875		0.588272	4		4		4		4		4		4		4		4		4
Male	M	Middle School	MS	11-15 years	C	Class PP- VI	A	Dzongkha	21 - 25 periods	C	B.Ed in Primary Education	A	4		3		3		3		3		3		4		3		3.25		0.511883	3		4		3		4		4		4		3		3		3
Male	M	High School	HS	Below 5 years	A	Class IX - XII	C	Science	Below 14 periods	A	Postgraduate Diploma in Education	C	4		4		4		4		4		4		4		3		3.875		0.588272	4		4		4		4		4		4		4		4		4
Male	M	High School	HS	Below 5 years	A	Class IX - XII	C	Dzongkha	15 - 20 periods	B	B.Ed in Secondary Education	B	4		3		3		2		2		3		3		3		2.875		0.458638	2		4		4		4		4		4		3		4		4
Male	M	High School	HS	6-10 years	B	Class IX - XII	C	Mathematics	15 - 20 periods	B	B.Ed in Secondary Education	B	3		3		4		3		3		3		3		3		3.125		0.49485	3		3		3		3		4		3		4		4		3
Male	M	High School	HS	11-15 years	C	Class IX - XII	C	Science	15 - 20 periods	B	B.Ed in Secondary Education	B	4		4		4		3		4		3		4		3		3.625		0.559308	4		4		3		4		4		4		3		4		4
Male	M	High School	HS	16 years and above	D	Class IX - XII	C	Dzongkha	15 - 20 periods	B	Master's degree	D	4		3		3		3		3		3		3		3		3.125		0.49485	3		4		3		3		3		3		3		3		3
Male	M	High School	HS	6-10 years	B	Class IX - XII	C	Science	21 - 25 periods	C	B.Ed in Secondary Education	B	3		3		3		2		2		3		3		3		2.75		0.439333	3		3		3		3		3		3		3		3		3
Male	M	High School	HS	6-10 years	B	Class IX - XII	C	Geography	21 - 25 periods	C	B.Ed in Secondary Education	B	4		4		3		2		4		3		3		3		3.25		0.511883	4		4		4		4		4		4		4		4		4
Female	F	High School	HS	6-10 years	B	Class IX - XII	C	Mathematics	21 - 25 periods	C	Postgraduate Diploma in Education	C	3		3		3		3		3		3		3		3		3		0.477121	3		3		3		3		3		3		3		3		3
Female	F	High School	HS	6-10 years	B	Class IX - XII	C	Dzongkha	21 - 25 periods	C	Postgraduate Diploma in Education	C	4		4		4		3		3		3		4		3		3.5		0.544068	4		4		4		4		4		4		4		4		4
Female	F	High School	HS	11-15 years	C	Class VII –VIII	B	Science	21 - 25 periods	C	Master's degree	D	4		4		4		4		3		4		4		3		3.75		0.574031	3		4		4		4		4		4		4		4		4
Female	F	High School	HS	16 years and above	D	Class IX - XII	C	Science	21 - 25 periods	C	Master's degree	D	1		3		1		1		1		3		2		3		1.875		0.273001	3		4		4		3		3		4		3		3		3
Male	M	Middle School	MS	6-10 years	B	Class IX - XII	C	Science	15 - 20 periods	B	Master's degree	D	4		4		4		3		3		4		4		3		3.625		0.559308	3		3		4		3		3		4		4		4		3
Female	F	Primary School	PS	6-10 years	B	Class PP- VI	A	Mathematics	Above 25 periods	D	B.Ed in Secondary Education	B	4		3		3		3		3		3		4		4		3.375		0.528274	3		4		3		3		4		4		3		4		3
Female	F	Middle School	MS	11-15 years	C	Class VII –VIII	B	Mathematics	Above 25 periods	D	B.Ed in Secondary Education	B	4		4		3		3		3		3		3		4		3.375		0.528274	3		4		4		3		4		4		3		4		3
Female	F	Primary School	PS	Below 5 years	A	Class PP- VI	A	English	Above 25 periods	D	B.Ed in Primary Education	A	4		3		4		4		4		4		4		4		3.875		0.588272	4		3		4		4		4		4		4		3		4
Female	F	High School	HS	6-10 years	B	Class IX - XII	C	Mathematics	21 - 25 periods	C	Postgraduate Diploma in Education	C	3		2		3		2		2		3		3		4		2.75		0.439333	3		3		3		3		3		4		3		3		2
Female	F	Middle School	MS	16 years and above	D	Class IX - XII	C	English	Above 25 periods	D	Master's degree	D	3		3		3		3		3		2		3		4		3		0.477121	3		3		4		4		4		4		3		3		3
Male	M	Middle School	MS	6-10 years	B	Class IX - XII	C	Science	21 - 25 periods	C	B.Ed in Secondary Education	B	3		2		3		2		4		3		3		3		2.875		0.458638	3		3		3		3		3		4		4		4		4
Male	M	High School	HS	16 years and above	D	Class IX - XII	C	Dzongkha	Below 14 periods	A	Postgraduate Diploma in Education	C	3		3		3		2		3		2		3		3		2.75		0.439333	4		4		4		3		4		4		3		3		4
Female	F	High School	HS	6-10 years	B	Class IX - XII	C	Accountancy	21 - 25 periods	C	Postgraduate Diploma in Education	C	3		2		3		3		3		3		3		4		3		0.477121	4		4		4		4		4		4		4		4		4
Male	M	Primary School	PS	16 years and above	D	Class PP- VI	A	Mathematics	21 - 25 periods	C	B.Ed in Primary Education	A	4		4		4		3		4		4		3		4		3.75		0.574031	3		4		3		4		4		4		4		4		4
Male	M	Middle School	MS	16 years and above	D	Class PP- VI	A	Science	15 - 20 periods	B	B.Ed in Secondary Education	B	3		3		2		3		2		3		3		4		2.875		0.458638	3		3		3		2		3		4		4		4		4
Male	M	High School	HS	Below 5 years	A	Class IX - XII	C	History	21 - 25 periods	C	B.Ed in Secondary Education	B	3		3		3		2		2		1		2		4		2.5		0.39794	2		3		2		2		3		3		3		3		3
Female	F	Middle School	MS	16 years and above	D	Class IX - XII	C	Science	21 - 25 periods	C	Master's degree	D	3		3		3		3		4		3		3		4		3.25		0.511883	3		3		4		3		4		3		3		4		4
Male	M	Middle School	MS	Below 5 years	A	Class PP- VI	A	Information technology	21 - 25 periods	C	B.Ed in Primary Education	A	3		3		3		2		3		2		3		4		2.875		0.458638	3		4		4		3		4		4		4		3		3
Male	M	High School	HS	6-10 years	B	Class IX - XII	C	Science	15 - 20 periods	B	Postgraduate Diploma in Education	C	3		2		3		2		2		2		2		3		2.375		0.375664	2		4		3		3		4		4		4		3		3
Male	M	Middle School	MS	Below 5 years	A	Class IX - XII	C	Science	21 - 25 periods	C	B.Ed in Secondary Education	B	4		3		3		3		4		2		3		4		3.25		0.511883	3		4		3		4		3		3		3		4		4
Male	M	Middle School	MS	11-15 years	C	Class PP- VI	A	Mathematics	21 - 25 periods	C	B.Ed in Primary Education	A	4		4		4		4		4		4		4		4		4		0.60206	4		4		4		4		4		4		4		4		4
Female	F	High School	HS	6-10 years	B	Class IX - XII	C	Science	21 - 25 periods	C	Postgraduate Diploma in Education	C	3		3		3		2		3		2		2		3		2.625		0.419129	3		3		2		3		3		3		3		3		4
Male	M	Middle School	MS	Below 5 years	A	Class PP- VI	A	English	Below 14 periods	A	B.Ed in Primary Education	A	4		4		3		2		3		3		3		4		3.25		0.511883	3		4		3		3		3		4		4		4		3
Female	F	High School	HS	11-15 years	C	Class IX - XII	C	Science	21 - 25 periods	C	Postgraduate Diploma in Education	C	4		3		3		2		2		2		3		4		2.875		0.458638	3		4		4		4		4		4		4		4		3
Male	M	High School	HS	6-10 years	B	Class IX - XII	C	Mathematics	15 - 20 periods	B	B.Ed in Secondary Education	B	3		3		2		2		4		3		4		4		3.125		0.49485	2		4		3		4		4		3		3		4		2
Male	M	High School	HS	11-15 years	C	Class IX - XII	C	English	15 - 20 periods	B	Master's degree	D	4		2		4		3		2		4		4		3		3.25		0.511883	4		4		4		4		4		4		4		4		4
Male	M	High School	HS	6-10 years	B	Class IX - XII	C	Science	21 - 25 periods	C	Postgraduate Diploma in Education	C	3		3		4		2		3		3		3		3		3		0.477121	3		4		4		3		4		3		3		3		3
Female	F	Middle School	MS	11-15 years	C	Class IX - XII	C	Science	21 - 25 periods	C	Master's degree	D	3		3		4		2		2		3		4		3		3		0.477121	3		4		4		4		4		3		3		3		3
Female	F	Middle School	MS	11-15 years	C	Class IX - XII	C	Mathematics	21 - 25 periods	C	Master's degree	D	4		3		4		4		4		4		4		3		3.75		0.574031	3		4		4		4		4		4		4		4		4
Male	M	High School	HS	Below 5 years	A	Class PP- VI	A	Science	21 - 25 periods	C	B.Ed in Primary Education	A	4		3		4		4		2		3		3		3		3.25		0.511883	4		4		4		4		4		4		4		4		4
Female	F	High School	HS	6-10 years	B	Class IX - XII	C	Mathematics	Above 25 periods	D	Postgraduate Diploma in Education	C	4		2		3		1		2		1		3		3		2.375		0.375664	2		3		4		2		3		2		3		3		2
Male	M	Middle School	MS	6-10 years	B	Class PP- VI	A	English	15 - 20 periods	B	B.Ed in Primary Education	A	4		3		3		3		4		4		3		3		3.375		0.528274	3		4		4		4		4		4		4		4		4
Female	F	High School	HS	6-10 years	B	Class IX - XII	C	Economics	21 - 25 periods	C	Postgraduate Diploma in Education	C	3		2		1		1		1		1		2		3		1.75		0.243038	2		3		2		2		2		3		2		2		2
Male	M	High School	HS	Below 5 years	A	Class VII –VIII	B	Mathematics	21 - 25 periods	C	B.Ed in Secondary Education	B	3		3		3		2		2		2		3		3		2.625		0.419129	3		4		4		4		4		4		3		4		3
Male	M	Middle School	MS	6-10 years	B	Class IX - XII	C	Dzongkha	21 - 25 periods	C	B.Ed in Secondary Education	B	4		2		3		2		3		2		3		3		2.75		0.439333	2		3		4		2		3		3		3		3		3
Male	M	High School	HS	16 years and above	D	Class PP- VI	A	Mathematics	21 - 25 periods	C	B.Ed in Primary Education	A	3		4		4		2		3		3		4		3		3.25		0.511883	3		3		4		3		3		4		4		4		4
Male	M	Middle School	MS	11-15 years	C	Class VII –VIII	B	History	15 - 20 periods	B	Master's degree	D	3		1		2		3		1		1		1		3		1.875		0.273001	1		4		4		3		4		4		4		3		4
Male	M	Middle School	MS	16 years and above	D	Class VII –VIII	B	Mathematics	21 - 25 periods	C	B.Ed in Primary Education	A	4		3		3		3		3		3		3		3		3.125		0.49485	4		3		3		4		4		4		4		4		4
Male	M	High School	HS	Below 5 years	A	Class IX - XII	C	History	15 - 20 periods	B	Postgraduate Diploma in Education	C	3		2		3		3		3		2		3		3		2.75		0.439333	3		4		4		4		4		4		4		4		3
Female	F	High School	HS	11-15 years	C	Class IX - XII	C	Science	21 - 25 periods	C	Master's degree	D	4		4		3		4		3		4		4		4		3.75		0.574031	2		4		4		3		4		4		4		4		3
Female	F	High School	HS	11-15 years	C	Class IX - XII	C	Science	21 - 25 periods	C	Master's degree	D	4		3		4		4		3		3		3		4		3.5		0.544068	4		4		3		4		4		4		4		4		3
Male	M	High School	HS	16 years and above	D	Class PP- VI	A	English	21 - 25 periods	C	B.Ed in Primary Education	A	4		3		3		2		3		2		3		3		2.875		0.458638	3		3		3		3		3		4		4		3		3
Female	F	Primary School	PS	Below 5 years	A	Class PP- VI	A	Science	Above 25 periods	D	B.Ed in Primary Education	A	2		3		2		2		3		3		3		3		2.625		0.419129	2		3		3		2		4		4		3		2		2
Male	M	High School	HS	11-15 years	C	Class IX - XII	C	Mathematics	21 - 25 periods	C	B.Ed in Primary Education	A	3		1		3		1		1		1		2		2		1.75		0.243038	2		2		2		2		2		3		2		3		3
Female	F	High School	HS	11-15 years	C	Class IX - XII	C	Mathematics	Above 25 periods	D	Master's degree	D	3		2		2		3		2		1		3		4		2.5		0.39794	2		4		4		3		3		4		4		4		3
Male	M	High School	HS	Below 5 years	A	Class IX - XII	C	History	21 - 25 periods	C	Postgraduate Diploma in Education	C	2		1		2		2		2		1		1		3		1.75		0.243038	1		2		4		3		3		3		2		2		2
[truncated: 105 more columns]
